# Supplementary material for: Validation of Electronic Health Record Phenotyping of Bipolar Disorder Cases and Controls
Source: Atypon-hosted journal article supplement (doi:10.1176/appi.ajp.2014.14030423), 2014-12-17
Supplement: appi.ajp.2014.14030423.ds001.pdf [file appi.ajp.2014.14030423.ds001.pdf]

## Figure S1: ICCBD Diagnostician Review Criteria for Diagnosis & Confidence: Instructions to Reviewers

### Step 1: Determine Diagnosis<sup>1</sup>:

- B = Bipolar Disorder
- NB = Not Bipolar Disorder
- NI = Not Enough Information/Not Classifiable
  - Internally inconsistent information
  - No actual diagnosis mentioned (i.e. "rule out...")
  - No strong evidence for any diagnosis

### Step 2: Assign Confidence:

#### A. Bipolar Disorder

- 0 = Low Confidence
  - Diagnostic label of Bipolar Disorder with no evidence inconsistent with the diagnosis
- 1 = Intermediate Confidence
  - Diagnostic label of Bipolar Disorder
  - AND**
  - Documentation of a distinct period of abnormally and persistently elevated expansive or irritable mood
  - AND**
  - During the period of mood disturbance,  $\leq 2$  of the following symptoms ( $\leq 3$  if the mood is irritable) and have been documented
    - Inflated self-esteem or grandiosity
    - Decreased need for sleep
    - More talkative than usual or pressure to keep talking
    - Flight of ideas or subjective experience that thoughts are racing
    - Distractibility
    - Increase in goal-directed activity or psychomotor agitation
    - Excessive involvement in pleasurable activities that have a high potential for painful consequences
- 2 = High Confidence
  - Diagnostic label of Bipolar Disorder
  - AND**
  - Documentation of prior or current distinct period of abnormally and persistently elevated expansive or irritable mood which includes documentation of  $\geq 3$  of the following symptoms ( $\geq 4$  if the mood is irritable)
    - Inflated self-esteem or grandiosity
    - Decreased need for sleep
    - More talkative than usual or pressure to keep talking
    - Flight of ideas or subjective experience that thoughts are racing
    - Distractibility

---

<sup>1</sup> Diagnosis is based on a consensus clinical impression among at least 3 clinicians based on all available information, including family history, medication, and course.

- Increase in goal-directed activity or psychomotor agitation
- Excessive involvement in pleasurable activities that have a high potential for painful consequences

**AND**

- Not better accounted for by substance use and/or general medical condition

**General Note**

When assigning a confidence rating of 1 or 2 for a case diagnosed with Bipolar Disorder, consider the implications of including this patient as a case in a genetic study of Bipolar Disorder.

**Format for Diagnosis & Confidence:**

- Diagnosis Code-Confidence Code
- Examples:
  - B-1 (indicating Bipolar Diagnosis with Intermediate Confidence)
  - NB-2 (indicating Not Bipolar with High Confidence)
  - NI (Indicating that there is not enough information to make a diagnosis)

## Data S1: Diagnosis, Drug, and Comorbidity Code Definitions

### CODE DEFINITIONS FOR DIAGNOSES

#### **Bipolar disorder (BP) diagnosis**

| Code                                      | Description                                 |
|-------------------------------------------|---------------------------------------------|
| ICD9 296.0*<br>ICD9 296.1*                | Billing code for manic disorder             |
| ICD9 296.4*<br>ICD9 296.5*<br>ICD9 296.6* | Billing code for bipolar affective disorder |
| ICD9 296.7*                               | Billing code for bipolar I disorder         |
| ICD9 296.8*                               | Billing code for bipolar NOS                |
| LPA44<br>LPB1598<br>ODA:YJHP1-1           | Bipolar in EMR problem list                 |

#### **Major Depression (MDD) diagnosis**

| Code                           | Description                                |
|--------------------------------|--------------------------------------------|
| ICD9 296.2*<br>ICD9 296.3*     | Billing code for major depressive disorder |
| LPB101<br>LPB1593<br>ODA:YJSN1 | Major depression in EMR problem list       |

#### **Schizophrenia (Scz) diagnosis**

| Code                             | Description                       |
|----------------------------------|-----------------------------------|
| ICD9 295.*                       | Billing code for schizophrenia    |
| ODA:YJCM1<br>ODA:YJBG1<br>LPA487 | Schizophrenia in EMR problem list |

#### **Organic Affective Disorder (OAS) diagnosis**

| Code        | Description                                 |
|-------------|---------------------------------------------|
| ICD9 295.83 | Billing code for Organic Affective Disorder |

## **CODE DEFINITIONS FOR DRUGS**

### **Lithium (Li) exposure**

| <b>Code</b>   | <b>Description</b>                                                                   |
|---------------|--------------------------------------------------------------------------------------|
| MDId 00061    | Lithium (Eskalith, Lithobid)<br>Dispensed by inpatient pharmacy or prescribed in EMR |
| LOINC 14334-7 | Therapeutic blood lithium level                                                      |

### **Valproic Acid (VPA) exposure**

| <b>Code</b>  | <b>Description</b>                                                                                  |
|--------------|-----------------------------------------------------------------------------------------------------|
| MDId 00083   | Valproic Acid (Depakote, Depacon, Depakene)<br>Dispensed by inpatient pharmacy or prescribed in EMR |
| MDId 03383   | Divalproex sodium<br>Dispensed by inpatient pharmacy or prescribed in EMR                           |
| LOINC 4086-5 | Therapeutic blood valproic acid level                                                               |

### **Secondary bipolar medication exposure**

| <b>Code</b> | <b>Description</b>                                                                          |
|-------------|---------------------------------------------------------------------------------------------|
| MDId 03180  | Risperidone (Risperdal)<br>Dispensed by inpatient pharmacy or prescribed in EMR             |
| MDId 04050  | Olanzapine (Zyprexa)<br>Dispensed by inpatient pharmacy or prescribed in EMR                |
| MDId 04220  | Quetiapine (Seroquel)<br>Dispensed by inpatient pharmacy or prescribed in EMR               |
| MDId 04747  | Ziprasidone (Geodon)<br>Dispensed by inpatient pharmacy or prescribed in EMR                |
| MDId 04825  | Aripiprazole (Abilify)<br>Dispensed by inpatient pharmacy or prescribed in EMR              |
| MDId 00058  | Carbamazepine (Tegretol)<br>Dispensed by inpatient pharmacy or prescribed in EMR            |
| MDId 03809  | Lamotrigine (Lamictal, Lamotrizine)<br>Dispensed by inpatient pharmacy or prescribed in EMR |

**CODE DEFINITIONS FOR COMORBIDITIES**

**Substance Abuse diagnosis**

| <b>Code</b>                                                                                                                         | <b>Description</b>          |
|-------------------------------------------------------------------------------------------------------------------------------------|-----------------------------|
| ICD9 291.*                                                                                                                          | Alcoholic Psychoses         |
| ICD9 292.*                                                                                                                          | Drug Psychoses              |
| ICD9 303.0*<br>ICD9 303.9*                                                                                                          | Alcohol dependence syndrome |
| ICD9 304.*                                                                                                                          | Drug dependence syndrome    |
| ICD9 305.0*<br>ICD9 305.2*<br>ICD9 305.3*<br>ICD9 305.4*<br>ICD9 305.5*<br>ICD9 305.6*<br>ICD9 305.7*<br>ICD9 305.8*<br>ICD9 305.9* | Nondependent abuse of drugs |

+ codes indicating patient is in remission are excluded

## Data S2: NLP Feature Regular Expressions

See Table S1 in the online data supplement.

File description:

| Field     | Description                                                                               |
|-----------|-------------------------------------------------------------------------------------------|
| Id        | identifier of regular expression                                                          |
| Type      | feature is consistent with BD (CW_Bipolar) or inconsistent with BD diagnosis (IW_Bipolar) |
| Category  | NLP feature category (corresponds to variables used to train 95-NLP Model)                |
| Negatable | Feature is negatable (1= Yes, 0 = No)                                                     |
| Regex     | Regular expression used to match this feature                                             |

Figure S2: Solution path for adaptive LASSO procedure.

# of selected features = 13

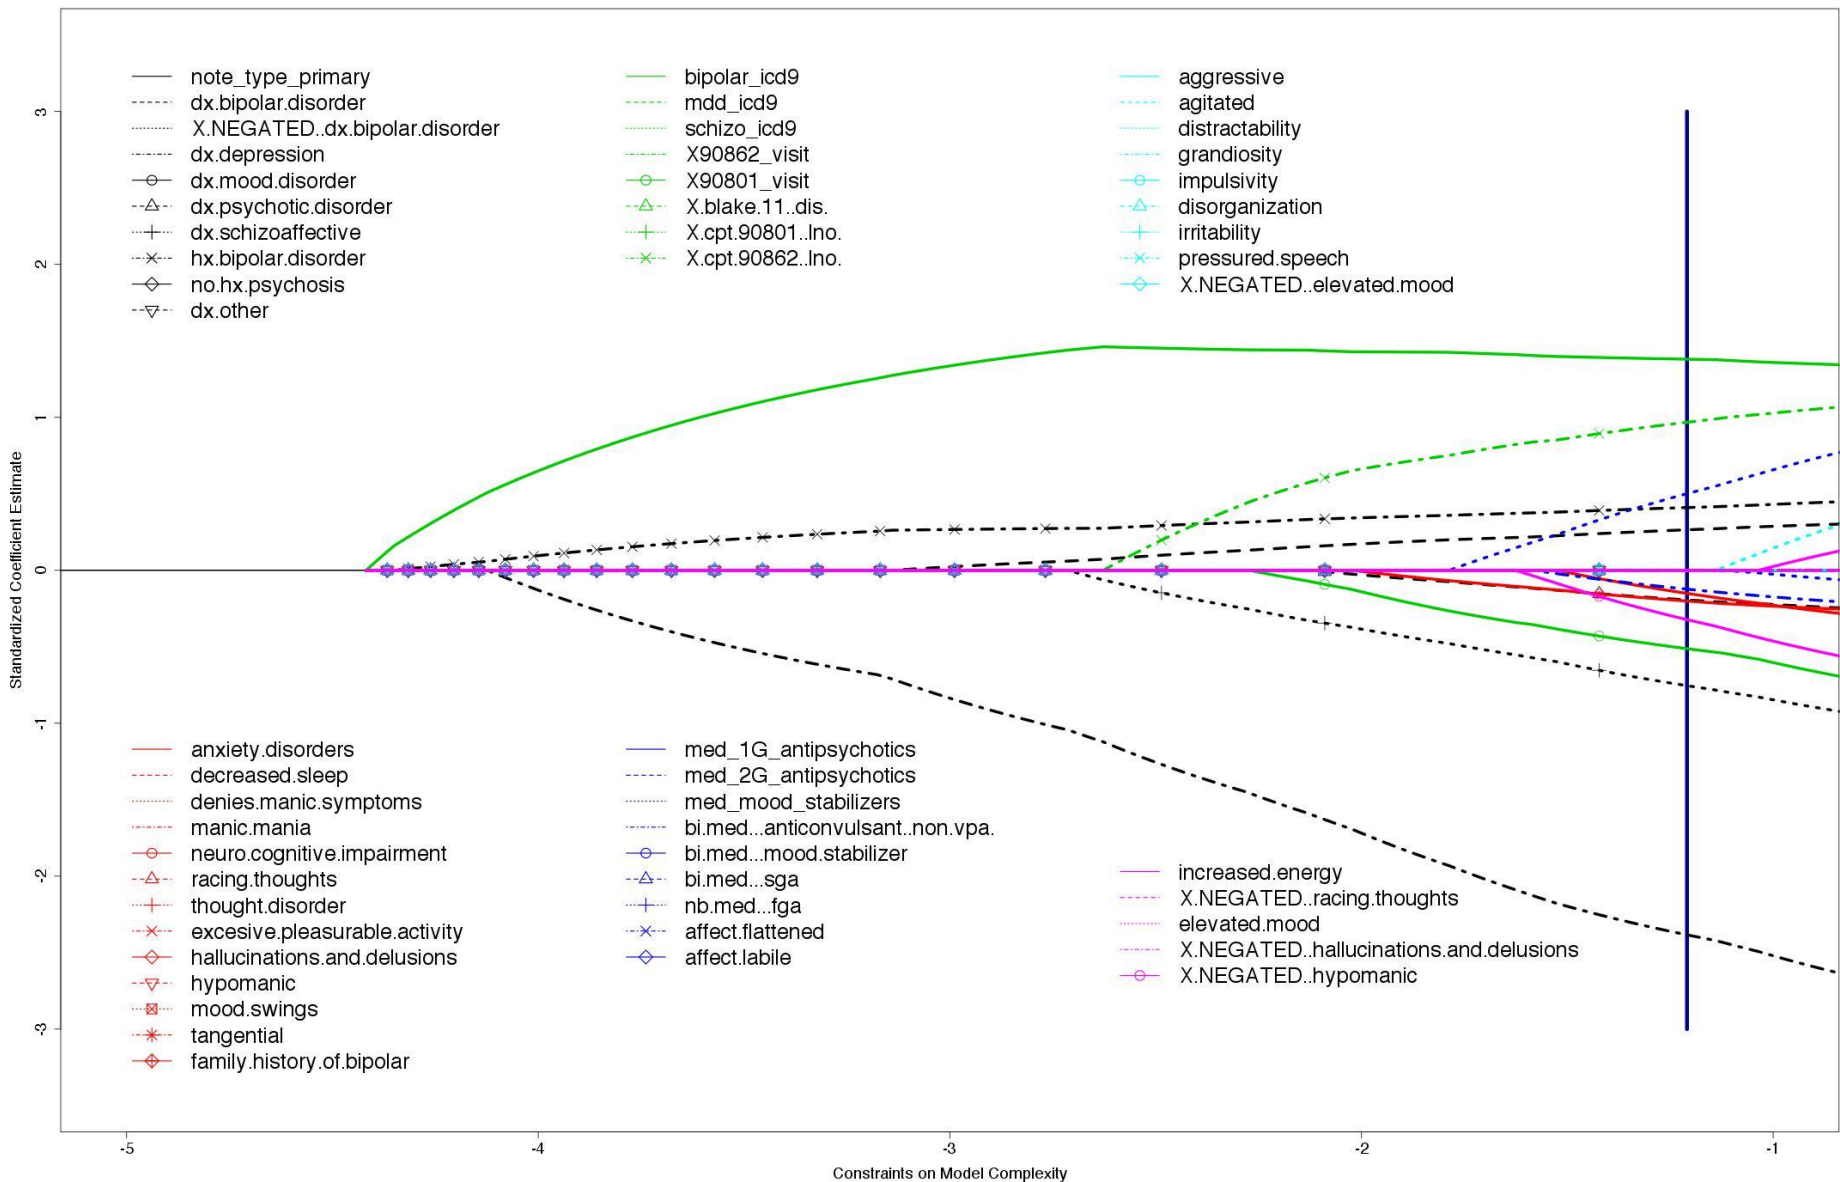

Each curve represents the coefficient estimate of a feature for a given value of penalty parameter, where model complexity is constrained more for lower values of the x axis. The vertical line at -1.2 represents the optimal penalty parameter corresponding to the final model selected based on the Bayesian Information Criteria.
